# Supplementary material for: Global analysis of fungal morphology exposes mechanisms of host cell escape
Source: Nat Commun. 2015 Mar 31;6:6741. doi: 10.1038/ncomms7741 (PMC4382923; doi:10.1038/ncomms7741)
Supplement: Supplementary Information — Supplementary Figures 1-7, Supplementary Tables 1-3 and Supplementary References [file ncomms7741-s1.pdf]

## Supplementary Information

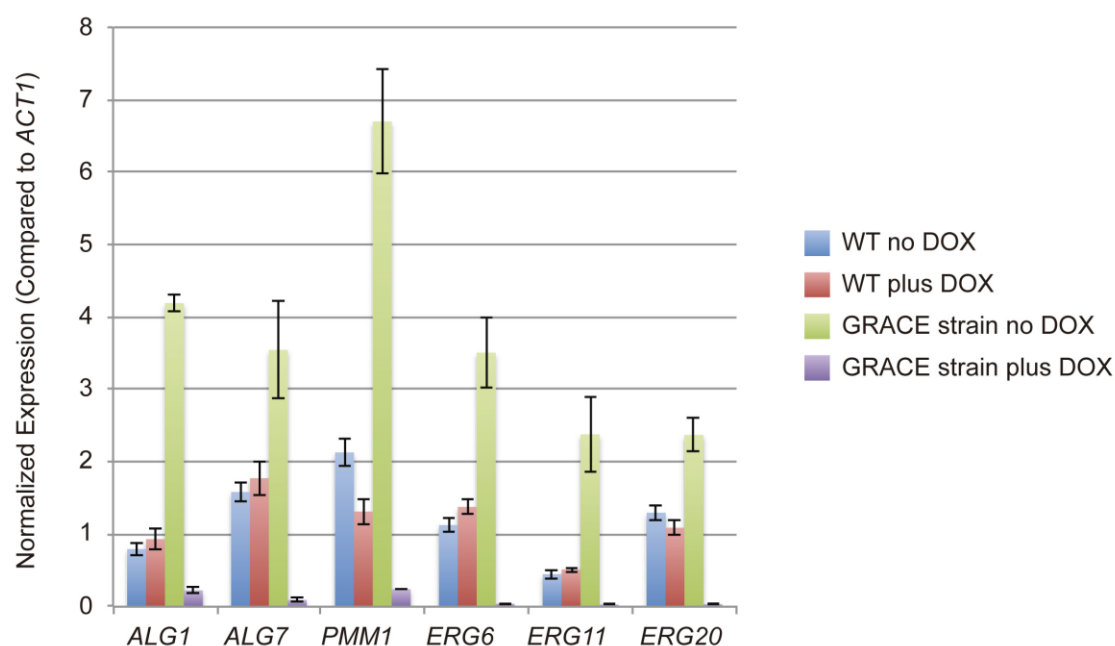

**Supplementary Figure 1:** Target gene transcript levels are depleted upon treatment with doxycycline (DOX). Strains were grown in the absence or presence of  $0.05 \mu\text{g mL}^{-1}$  DOX overnight, subcultured into fresh medium of the same condition and grown to mid-log phase. Target gene transcript levels were normalized to *ACT1*. Data are means  $\pm$  S.D. for triplicate samples. Figure represents one of two biological replicates.

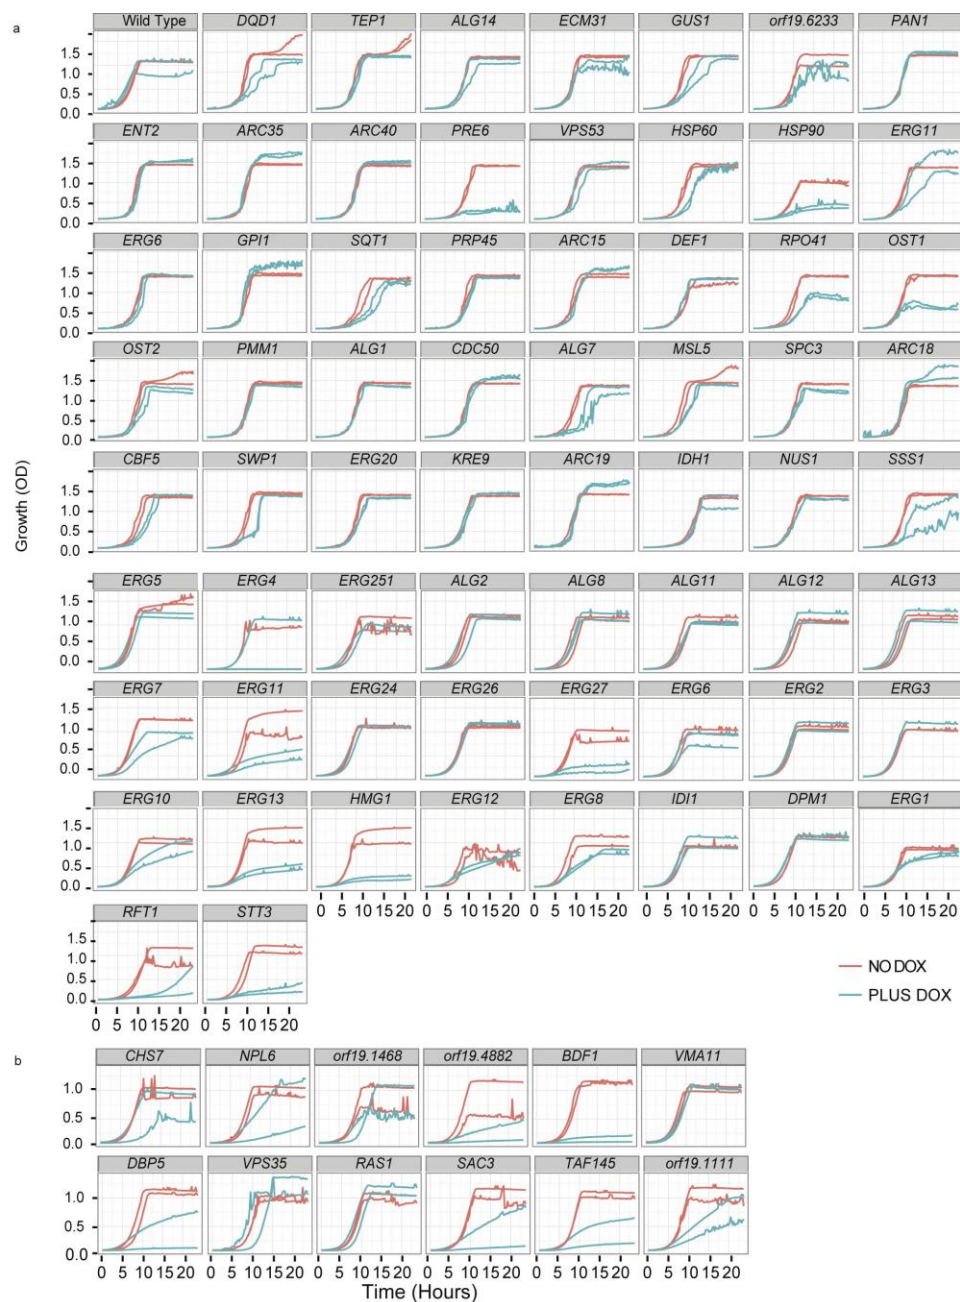

**Supplementary Figure 2:** Growth kinetics of GRACE strains. Strains were inoculated from overnight cultures into 96-well culture plates in the absence (in blue) and presence of DOX (in red) and incubated with shaking in a TECAN plate reader at 37°C. The OD600 values were measured every 15 minutes for 24 hours. Each graph displays two biological replicates performed in triplicate. **(A)** Strains grown in 0.05 µg mL<sup>-1</sup> DOX. **(B)** Strains grown in 0.5 µg mL<sup>-1</sup> DOX.

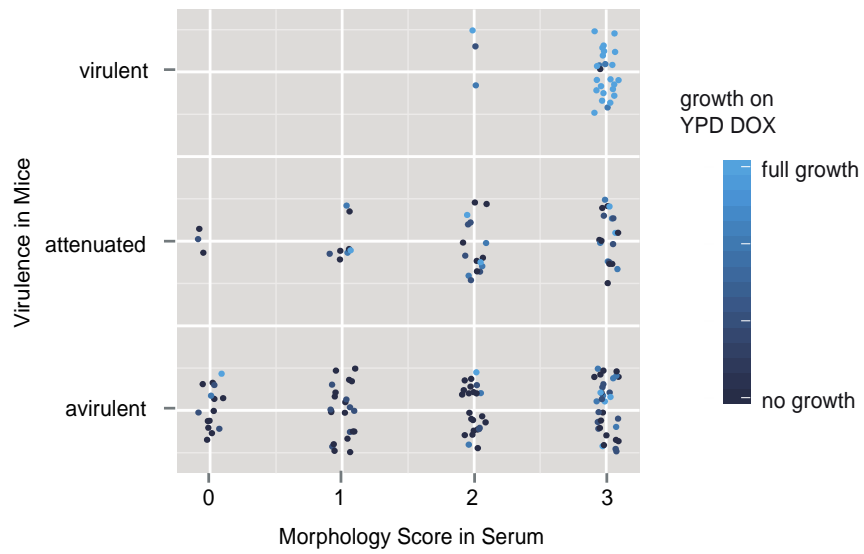

**Supplementary Figure 3:** Correlation between virulence in mice and morphology score in response to serum. Color bar indicates growth in rich medium. Morphology scores indicate the degree of filamentation, where 0 indicates yeast form and 3 indicates filaments. Virulence data from Becker *et al.*<sup>1</sup>

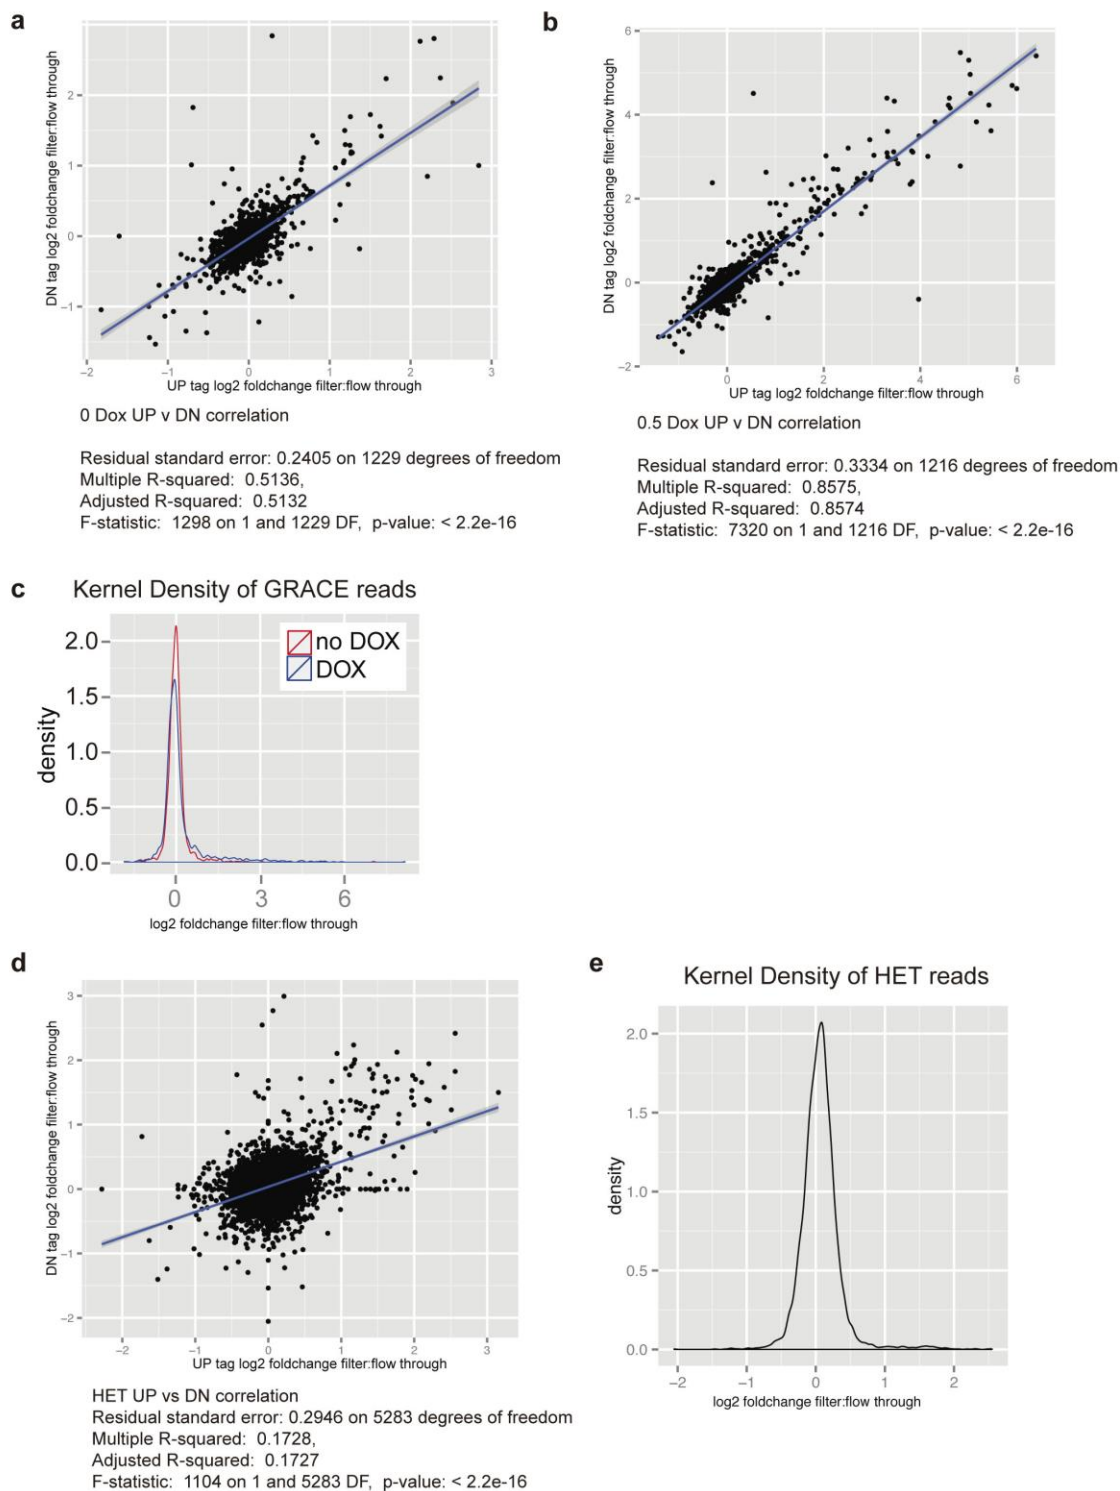

**Supplementary Figure 4:** Correlation between the  $\log_2$  fold-change of normalized UPTAG and DNTAG barcode reads in the GRACE strains for the  $0 \mu\text{g mL}^{-1}$  DOX (**A**) and  $0.5 \mu\text{g mL}^{-1}$  DOX (**B**) treated pooled samples. (**C**) Kernel density graph of averaged

UPTAG and DNTAG  $\log_2$  reads in the GRACE strains for the 0  $\mu\text{g mL}^{-1}$  DOX and 0.5  $\mu\text{g mL}^{-1}$  DOX samples. **(D)** Correlation between the  $\log_2$  fold-change of normalized UPTAG and DNTAG barcode reads between filter retained and flow-through HET strains. **(E)** Kernel density graph of averaged UPTAG and DNTAG  $\log_2$  reads in the HET strains.

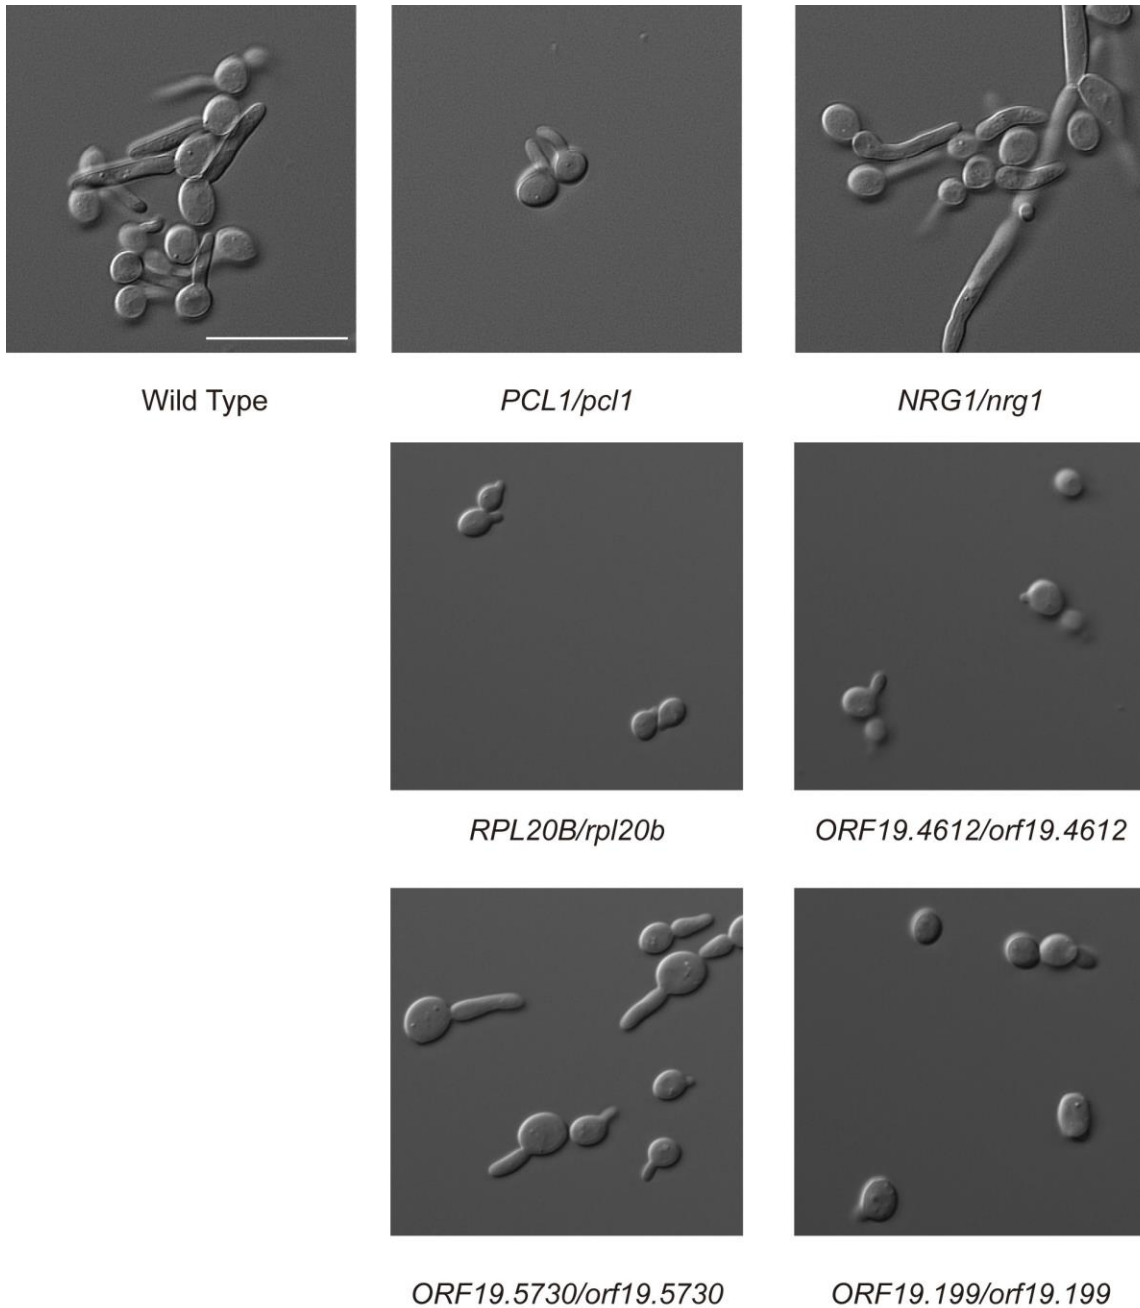

**Supplementary Figure 5:** Pooled analysis of the HET collection revealed mutants with altered morphogenesis. Phenotypes were verified after incubation for 30 minutes at 37°C in medium containing 1% v/v serum. All images taken at 40X magnification. Scale bar represents 20  $\mu\text{m}$ .

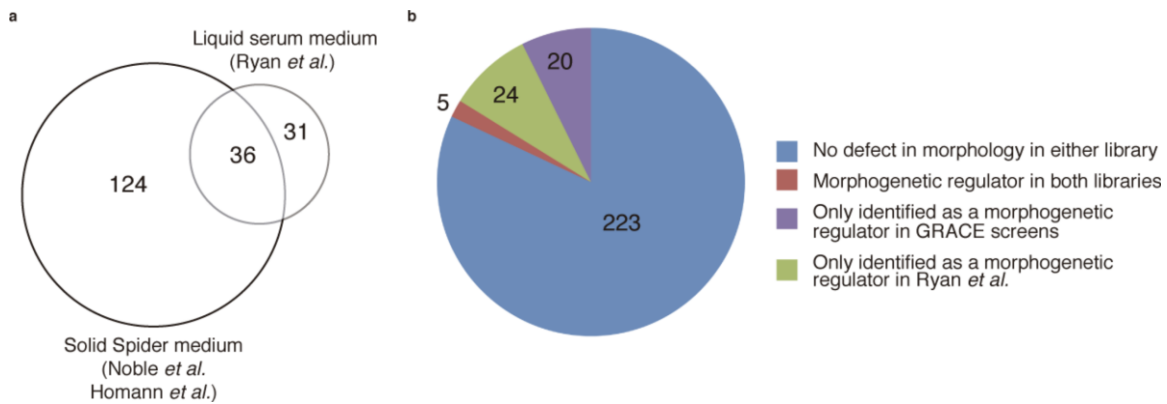

**Supplementary Figure 6:** Comparison of morphogenetic regulators identified in different studies. **(A)** Comparison of morphogenetic regulators identified in screens on Spider solid performed by Noble *et al.*<sup>2</sup> and Homann *et al.*<sup>3</sup> and those identified with the same libraries by Ryan *et al.*<sup>6</sup> in serum liquid conditions. **(B)** Comparison of morphogenetic regulators identified for mutants covered in the GRACE library and in the screens performed by Ryan *et al.*<sup>4</sup>.

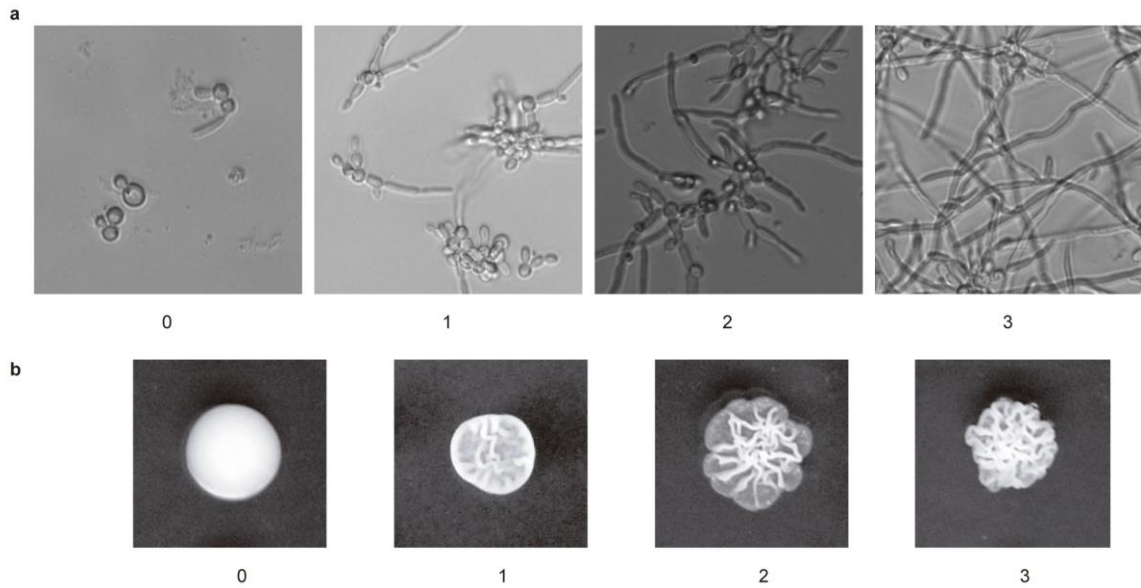

**Supplementary Figure 7: (A)** Microscopy images were scored from 0 to 3, based on the degree of filamentation. Representative images of each score are displayed here. **(B)** Solid plate filamentation was scored from 0 to 3, based on the colony morphology. Representative images of each score are displayed here.

**Supplementary Table 1: Macrophage lysis and morphology scores**

| GRACE strain      | No DOX         |            | Plus DOX       |                 |
|-------------------|----------------|------------|----------------|-----------------|
|                   | Lysis Rate (%) | Morphology | Lysis Rate (%) | Morphology      |
| <i>TAF145</i>     | 18.36          | filament   | 0.61           | pseudohyphae    |
| <i>BDF1</i>       | 21.52          | filament   | 0.69           | yeast           |
| <i>orf19.1111</i> | 17.73          | filament   | 0.74           | short filaments |
| <i>DBP5</i>       | 19.14          | filament   | 0.9            | yeast           |
| <i>orf19.4882</i> | 17.65          | filament   | 1.03           | yeast           |
| <i>NPL6</i>       | 14.6           | filament   | 1.15           | short filaments |
| <i>VMA11</i>      | 15.05          | filament   | 2.17           | yeast           |
| <i>VPS35</i>      | 15.92          | filament   | 2.59           | filament        |
| <i>RFT1</i>       | 18.1           | filament   | 2.84           | hyperfilament   |
| <i>SPC3</i>       | 21.15          | filament   | 3.03           | yeast           |
| <i>ERG11</i>      | 20.54          | filament   | 3.39           | pseudohyphae    |
| <i>CBF5</i>       | 20.85          | filament   | 3.48           | yeast           |
| <i>PRE6</i>       | 18.54          | filament   | 3.61           | pseudohyphae    |
| <i>RPO41</i>      | 8.33           | filament   | 4              | yeast           |
| <i>ERG7</i>       | 16.94          | filament   | 4.36           | yeast           |
| <i>SWP1</i>       | 15.17          | filament   | 4.38           | yeast           |
| <i>ERG8</i>       | 15.67          | filament   | 4.41           | yeast           |
| <i>STT3</i>       | 17.73          | filament   | 4.73           | yeast           |
| <i>DQD1</i>       | 23.51          | filament   | 5.36           | yeast           |
| <i>GUS1</i>       | 23.32          | filament   | 5.84           | yeast           |
| <i>HSP60</i>      | 22.77          | filament   | 6.04           | yeast           |
| <i>ERG6</i>       | 25.27          | filament   | 6.28           | yeast           |
| <i>KRE9</i>       | 18.1           | filament   | 6.28           | yeast           |
| <i>OST1</i>       | 18.58          | filament   | 6.38           | yeast           |
| <i>SQT1</i>       | 28.92          | filament   | 6.75           | short filaments |
| <i>RAS1</i>       | 21.09          | filament   | 6.95           | short filaments |
| <i>ARC40</i>      | 22.7           | filament   | 7.65           | pseudohyphae    |
| <i>PRP45</i>      | 13.5           | filament   | 8.14           | yeast           |
| <i>WBP1</i>       | 16.61          | filament   | 8.2            | yeast           |
| <i>NUS1</i>       | 16.14          | filament   | 8.28           | yeast           |
| <i>GPI16</i>      | 22.99          | filament   | 8.33           | yeast           |
| <i>IDH1</i>       | 14.29          | filament   | 8.41           | filament        |
| <i>ARC15</i>      | 23.14          | filament   | 8.67           | pseudohyphae    |
| <i>ALG14</i>      | 15.26          | filament   | 8.72           | pseudohyphae    |
| <i>DEF1</i>       | 21.58          | filament   | 9.29           | short filaments |
| <i>ARC18</i>      | 18.92          | filament   | 9.68           | pseudohyphae    |
| <i>CDC50</i>      | 21.74          | filament   | 9.7            | yeast           |
| <i>ERG20</i>      | 19.93          | filament   | 9.7            | yeast           |

|                   |       |          |       |                 |
|-------------------|-------|----------|-------|-----------------|
| <i>SSS1</i>       | 17.83 | filament | 9.95  | yeast           |
| <i>HSP90</i>      | 22.29 | filament | 10.32 | short filaments |
| <i>ENT2</i>       | 23.4  | filament | 10.45 | pseudohyphae    |
| <i>VPS53</i>      | 22.64 | filament | 10.51 | short filaments |
| <i>MSL5</i>       | 15.87 | filament | 10.55 | yeast           |
| <i>OST2</i>       | 20.15 | filament | 10.84 | yeast           |
| <i>ALG7</i>       | 18.9  | filament | 12.38 | yeast           |
| <i>PAN1</i>       | 18.69 | filament | 12.47 | pseudohyphae    |
| <i>ALG11</i>      | 12.9  | filament | 12.6  | yeast           |
| <i>ECM31</i>      | 21.64 | filament | 12.62 | yeast           |
| <i>ARC35</i>      | 22.16 | filament | 12.68 | pseudohyphae    |
| <i>ARC19</i>      | 12.88 | filament | 12.79 | pseudohyphae    |
| <i>PMM1</i>       | 19.87 | filament | 13.33 | yeast           |
| <i>SAC3</i>       | 17.02 | filament | 13.61 | short filaments |
| <i>orf19.6233</i> | 25.98 | filament | 15.98 | yeast           |
| <i>CDC55</i>      | 20.6  | filament | 16.67 | pseudohyphae    |
| <i>TEP1</i>       | 30.95 | filament | 21.67 | filament        |
| WT                | 24.63 | filament | 24.02 | filament        |
| <i>ALG1</i>       | 24.25 | filament | 24.51 | yeast           |
| <i>BMT3</i>       | 21.7  | filament | 25.19 | filament        |
| <i>GPI10</i>      | 23.65 | filament | 21.86 | filament        |
| <i>GWT1</i>       | 21.39 | filament | 20    | short filaments |
| <i>MCD4</i>       | 19.33 | filament | 11.73 | short filaments |
| <i>MNN1</i>       | 23.93 | filament | 24.6  | short filaments |
| <i>MNN24</i>      | 21.94 | filament | 23.74 | filament        |
| <i>MNT1</i>       | 21.96 | filament | 23.51 | filament        |
| <i>MNN2</i>       | 26.29 | filament | 20.2  | filament        |
| <i>OCH1</i>       | 22.18 | filament | 23.53 | short filaments |
| <i>PMT1</i>       | 16.52 | filament | 17.07 | filament        |
| <i>VAN1</i>       | 25.88 | filament | 24.67 | filament        |

**Supplementary Table 2: Macrophage lysis rates in response to pre-treatments and species**

| Strain                        | Pre-incubation                        | Treatment       | Average Lysis Rate (%) | Standard Deviation | Comments                           |
|-------------------------------|---------------------------------------|-----------------|------------------------|--------------------|------------------------------------|
| WT                            | YEPD                                  | live            | 19.02                  | 1.73               |                                    |
| WT                            | YEPD                                  | heat killed     | 3.2                    | 1.85               |                                    |
| WT                            | conditioned media                     | heat killed     | 3.11                   | 0.49               |                                    |
| WT                            | 30min phagocytosis                    | heat killed     | 6.34                   | 1.67               |                                    |
| WT                            | 60min phagocytosis                    | heat killed     | 17.51                  | 4.84               |                                    |
| WT                            | 60min phagocytosis                    | formalin killed | 13.95                  | 5.13               |                                    |
| WT                            | 90min phagocytosis                    | heat killed     | 18.37                  | 2.16               |                                    |
| WT                            | unphagocytized                        | heat killed     | 5.66                   | 1.14               |                                    |
| WT                            | EndoH                                 | heat killed     | 4.49                   | 2.69               |                                    |
| ALG1                          | unphagocytized                        | heat killed     | 5.66                   | 1.61               |                                    |
| ALG1                          | 60min phagocytosis                    | heat killed     | 19.82                  | 1.97               |                                    |
| ALG1                          | EndoH                                 | heat killed     | 5.33                   | 4.65               |                                    |
| orf19.6233                    | 60min phagocytosis                    | heat killed     | 16.38                  | 2.16               |                                    |
| orf19.6233                    | 60min phagocytosis,<br>fomalin killed | formalin killed | 14.18                  | 3.08               |                                    |
| orf19.6233                    | EndoH                                 | heat killed     | 4.72                   | 3.43               |                                    |
| OST1                          | unphagocytized                        | heat killed     | 1.38                   | 1.96               |                                    |
| OST1                          | 60min phagocytosis                    | heat killed     | 5.1                    | 3.79               |                                    |
| ERG6                          | 60min phagocytosis                    | heat killed     | 5.91                   | 0.56               |                                    |
| <i>S. cerevisiae</i>          | unphagocytized                        | heat killed     | 3                      | 4.24               |                                    |
| <i>S. cerevisiae</i>          | 60min phagocytosis                    | heat killed     | 5.34                   | 1.4                |                                    |
| <i>C. neoformans</i><br>WT    | unphagocytized                        | heat killed     | 0                      | 0                  | very few<br>phagocytosis<br>events |
| <i>C. neoformans</i><br>WT    | 60min phagocytosis                    | heat killed     | 2.56                   | 3.63               | very few<br>phagocytosis<br>events |
| <i>C. neoformans</i><br>cap59 | YEPD                                  | live            | 7.97                   | 1.16               |                                    |
| <i>C. neoformans</i><br>cap59 | unphagocytized                        | heat killed     | 1.6                    | 0.8                |                                    |
| <i>C. neoformans</i><br>cap59 | 60min phagocytosis                    | heat killed     | 13.92                  | 3.97               |                                    |
| <i>C. neoformans</i><br>cap59 | EndoH                                 | heat killed     | 1.56                   | 2.21               |                                    |

**Supplementary Table 3: Oligonucleotides used in this study**

| Primer                               | Sequence (5' to 3')                                                 |
|--------------------------------------|---------------------------------------------------------------------|
| oLC1131- <i>ERG11</i> - Forward      | GATGTTTCTGCTGAAGATGC                                                |
| oLC1132- <i>ERG11</i> - Reverse      | ATAGTTGAGCAAATGAACGG                                                |
| oLC2285- <i>ACT1</i> -Forward        | GACCTTGAGATACCCAATTG                                                |
| oLC2286- <i>ACT1</i> - Reverse       | CAGCTTGAATGGAAACGTAG                                                |
| oLC3546- <i>ALG1</i> -Forward        | CTCAACTTCATTACTCCTG                                                 |
| oLC3547- <i>ALG1</i> -Reverse        | GTACTTTAGGATAGTCCTCTG                                               |
| oLC3548- <i>PMM1</i> - Forward       | CACCAATTGGTAGAAATGCT                                                |
| oLC3549- <i>PMM1</i> - Reverse       | GTTTCATCTTCAACGTGTTGT                                               |
| oLC3550- <i>ALG7</i> - Forward       | TTTGTCGGAGTGTCTATTGGC                                               |
| oLC3551- <i>ALG7</i> - Reverse       | CTTGACAGGGCAAGATGTG                                                 |
| oLC3552- <i>ERG6</i> - Forward       | TTATGCCATTGAAGCTACCG                                                |
| oLC3553- <i>ERG6</i> - Reverse       | GCTTGTTCAAGCAACTTTACG                                               |
| oLC3554- <i>ERG20</i> - Forward      | TAGAAGGGGCCATTTATATC                                                |
| oLC3555- <i>ERG20</i> - Reverse      | CCAATTTGTTCTGGAGTACC                                                |
| UPTAG universal amplification primer | AATGATACGGCGACCAACCGAGATCTACACCGAGGTCGAGAATGATGCCACGAGGTCTCT        |
| UPTAG index amplification primer     | CAAGCAGAAGACGGCATAACGAGATNNNNNGCCATTGTCTGTGACCTGCAGCGTACG           |
| DNTAG universal amplification primer | AATGATACGGCGACCAACCGAGATCTACACCACATGATATGTTGAGCGGTGTCGGTCTCGTAG     |
| DNTAG index amplification primer     | CAAGCAGAAGACGGCATAACGAGATNNNNNGAGTATCTGTATCTGGCC GAGCTCGAATTCATCGAT |
| UPTAG sequencing primer              | CGAGGTCGAGAATGATGTCACGAGGTCTCT                                      |
| DNTAG sequencing primer              | CACATGATATGTTGAGCGGTGTCGGTCTCGTAG                                   |
| UPTAG index sequencing primer        | CGTACGCTGCAGGTCGACAGACAAATGGC                                       |
| DNTAG index sequencing primer        | ATCGATGAATTCGAGCTCGGCCAGATACAGATACTC                                |

### Supplementary References:

1. Becker, J. M. *et al.* Pathway analysis of *Candida albicans* survival and virulence determinants in a murine infection model. *Proc Natl Acad Sci* **107**, 22044–22049 (2010).
2. Noble, S. M., French, S., Kohn, L. A., Chen, V. & Johnson, A. D. Systematic screens of a *Candida albicans* homozygous deletion library decouple morphogenetic switching and pathogenicity. *Nat Genet* **42**, 590–598 (2010).
3. Homann, O. R., Dea, J., Noble, S. M. & Johnson, A. D. A phenotypic profile of the *Candida albicans* regulatory network. *PLoS Genet* **5**, e1000783 (2009).
4. Ryan, O. *et al.* Global gene deletion analysis exploring yeast filamentous growth. *Science* **337**, 1353–1356 (2012).
